# Supplementary material for: Characterization of Vegetative Bacillus cereus and Bacillus subtilis Strains Isolated from Processed Cheese Products in an Italian Dairy Plant
Source: MDPI journal article supplement (doi:10.3390/foods10112876), 2021-11-21
Supplement: s1 [file s1]

**Table S1:** Isolated *Bacillus* strains included in the study

| <b>ID strain</b> | <b>Organism</b>          | <b>Collection period</b> |
|------------------|--------------------------|--------------------------|
| BC_2             | <i>Bacillus cereus</i>   | Summer                   |
| BC_3             | <i>Bacillus cereus</i>   | Summer                   |
| BC_5             | <i>Bacillus cereus</i>   | Summer                   |
| BC_14            | <i>Bacillus cereus</i>   | Summer                   |
| BC_19            | <i>Bacillus cereus</i>   | Summer                   |
| BC_22            | <i>Bacillus cereus</i>   | Summer                   |
| BC_24            | <i>Bacillus cereus</i>   | Summer                   |
| BC_26            | <i>Bacillus cereus</i>   | Autumn                   |
| BC_29            | <i>Bacillus cereus</i>   | Autumn                   |
| BC_35            | <i>Bacillus cereus</i>   | Autumn                   |
| BC_36            | <i>Bacillus cereus</i>   | Autumn                   |
| BC_38            | <i>Bacillus cereus</i>   | Autumn                   |
| BC_40            | <i>Bacillus cereus</i>   | Autumn                   |
| BC_44            | <i>Bacillus cereus</i>   | Autumn                   |
| BS_8             | <i>Bacillus subtilis</i> | Summer                   |
| BS_15            | <i>Bacillus subtilis</i> | Summer                   |
| BS_17            | <i>Bacillus subtilis</i> | Summer                   |
| BS_18            | <i>Bacillus subtilis</i> | Summer                   |
| BS_20            | <i>Bacillus subtilis</i> | Summer                   |
| BS_23            | <i>Bacillus subtilis</i> | Summer                   |
| BS_25            | <i>Bacillus subtilis</i> | Summer                   |
| BS_28            | <i>Bacillus subtilis</i> | Summer                   |
| BS_31            | <i>Bacillus subtilis</i> | Summer                   |
| BS_34            | <i>Bacillus subtilis</i> | Summer                   |
| BS_41            | <i>Bacillus subtilis</i> | Autumn                   |
| BS_42            | <i>Bacillus subtilis</i> | Autumn                   |
| BS_48            | <i>Bacillus subtilis</i> | Autumn                   |
| BS_49            | <i>Bacillus subtilis</i> | Autumn                   |
| BS_50            | <i>Bacillus subtilis</i> | Autumn                   |
| BS_51            | <i>Bacillus subtilis</i> | Autumn                   |
| BS_52            | <i>Bacillus subtilis</i> | Autumn                   |
| BS_53            | <i>Bacillus subtilis</i> | Autumn                   |
| BS_54            | <i>Bacillus subtilis</i> | Autumn                   |
| BS_55            | <i>Bacillus subtilis</i> | Autumn                   |
| BS_57            | <i>Bacillus subtilis</i> | Autumn                   |
